# Supplementary material for: Metallo-Curcumin-Conjugated DNA Complexes Induces Preferential Prostate Cancer Cells Cytotoxicity and Pause Growth of Bacterial Cells
Source: PubMed Central journal article supplement (PMC6175843; doi:10.1038/s41598-018-33369-z), 2018-10-08
Supplement: 41598_2018_33369_MOESM1_ESM.pdf [file 41598_2018_33369_MOESM1_ESM.pdf]

## Supplementary Information

### **Metallo-Curcumin-Conjugated DNA Complexes Induces Preferential Prostate Cancer**

### **Cells Cytotoxicity and Pause Growth of Bacterial Cells**

Srivithya Vellampatti<sup>1‡</sup>, Gopalakrishnan Chandrasekaran<sup>2‡</sup>, Sekhar Babu Mitta<sup>1</sup>, Vinoth-Kumar Lakshmanan<sup>2,3</sup> & Sung Ha Park<sup>1</sup>

<sup>1</sup> Sungkyunkwan Advanced Institute of Nanotechnology (SAINT) and Department of Physics, Sungkyunkwan University, Suwon 16419, Korea.

<sup>2</sup> Department of Biomedical Sciences, Chonnam National University Medical School, Gwangju 61469, Korea.

<sup>3</sup> Department of Biomedical Engineering, Sri Shakthi Institute of Engineering and Technology, Coimbatore 641062, India

‡ These authors contributed equally to the paper.

Correspondence and requests for materials should be addressed to V.-K.L. (email: lvinothkumarbme@siet.ac.in) and S.H.P. (email: sunghapark@skku.edu).

**Supplementary Fig. S1.** DNA base sequences and pictorial representation of DNA rings.

**Supplementary Fig. S2.** Representative negative ion mode TOF-SIMS images.

**Supplementary Table S1.** RDNA base sequence information.

**Supplementary Table S2.** Sticky-end sequences for DNA rings.

**Supplementary Table S3.** FTIR absorption frequencies of SDNA and their spectral assignments.

**Supplementary Fig. S1.** DNA base sequences and pictorial representation of DNA rings. (a) A unit building block of RDNA containing two strands, Ring 1-1 and Ring 1-2. The complementary sticky-ends are indicated as s1, s1' and s2, s2'. (b) Schematic diagram of an RDNA. The outer and inner diameters of the RDNA were 29 and 13 nm, respectively.

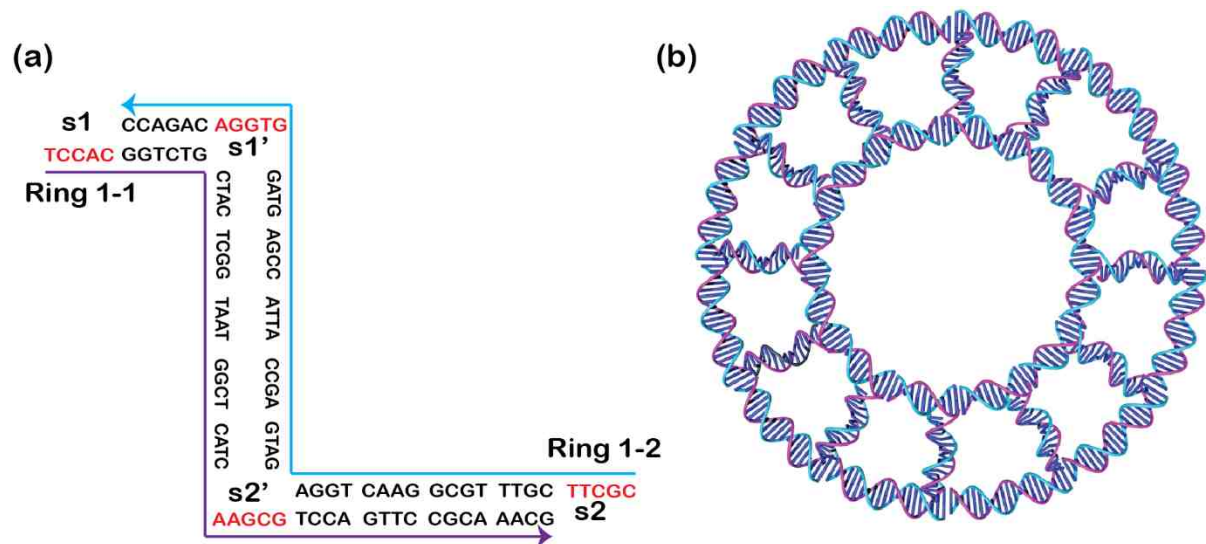

**Supplementary Fig. S2.** Representative negative ion mode TOF-SIMS images (scan size of  $150 \times 150 \mu\text{m}^2$ ) showing the distribution of sugar, phosphate backbone, and nucleobases fragments in SDNA molecules and SDNA-Cu-C complexes.

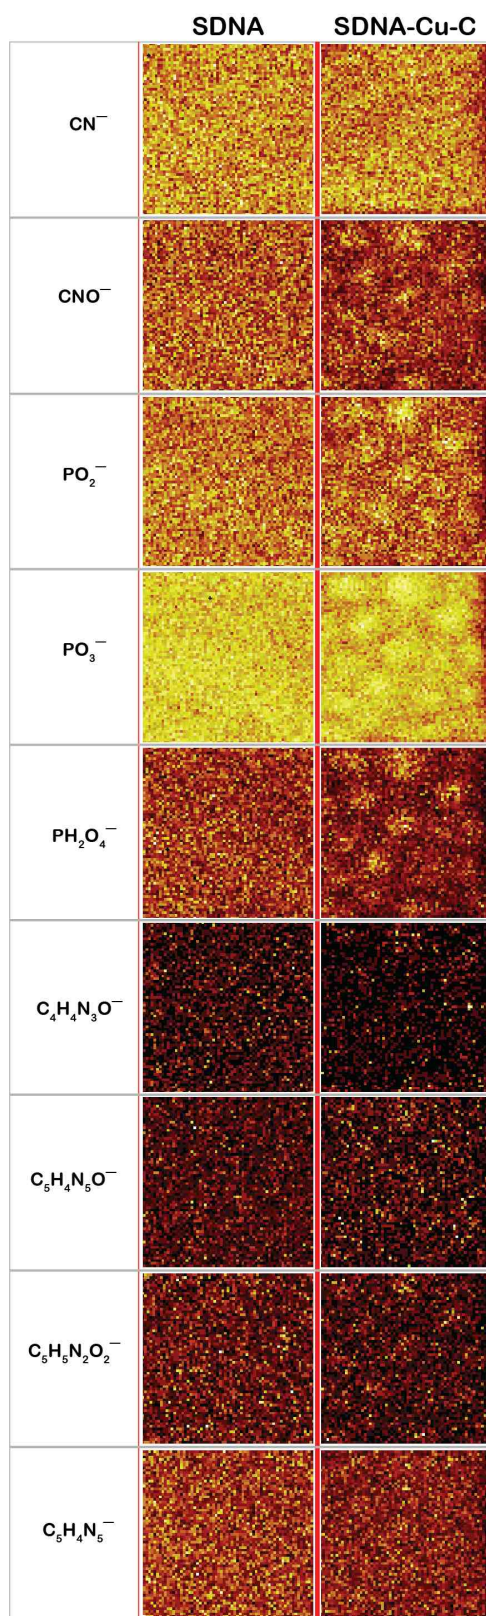

**Supplementary Table S1.** RDNA base sequence information: strand name, total number of nucleotides, and base sequence.

| <b>Strand Name</b> | <b>Total # of nucleotides</b> | <b>Sequence (5' to 3')</b>                                          |
|--------------------|-------------------------------|---------------------------------------------------------------------|
| Ring 1-1           | 52                            | TCCA CGGT CTGC TACT CGGT AATG GCTC<br>ATCA AGCG TCCA GTTC CGCA AACG |
| Ring 1-2           | 52                            | CGCT TCGT TTGC GGAA CTGG AGAT GAGC<br>CATT ACCG AGTA GGTG GACA GACC |

**Supplementary Table S2.** Sticky-end sequences for DNA rings (RDNA).

|           | <b>5' to 3'</b> | <b>3' to 5'</b> |     |
|-----------|-----------------|-----------------|-----|
| <b>s1</b> | TCCAC           | AGGTG           | s1' |
| <b>s2</b> | CGCTT           | GCGAA           | s2' |

**Supplementary Table S3.** FTIR absorption frequencies of SDNA and their spectral assignments.

| <b>DNA band position [Wavenumber (cm<sup>-1</sup>)]</b> | <b>Band assignment</b>                             |
|---------------------------------------------------------|----------------------------------------------------|
| 780                                                     | Sugar vibrations                                   |
| 888                                                     | Deoxyribose ring vibrations                        |
| 960                                                     | C-C and C-O stretching of the backbone             |
| 1018                                                    | C-O ribose                                         |
| 1058                                                    | C-O deoxyribose stretching                         |
| 1083                                                    | PO <sub>2</sub> <sup>-</sup> symmetric stretch     |
| 1230                                                    | PO <sub>2</sub> <sup>-</sup> antisymmetric stretch |
| 1371                                                    | Cytosine and Guanine                               |
| 1486                                                    | Cytosine in-plane vibrations                       |
| 1606                                                    | Adenine C7=N stretching                            |
| 1648                                                    | Thymine (C2=O stretching)                          |
| 3339                                                    | OH stretching                                      |
